# Supplementary material for: Successful Production of Offspring Derived from Phospholipase C Zeta-Deficient Sperm by Additional Artificial Activation
Source: MDPI journal article supplement (doi:10.3390/life13040980), 2023-04-10
Supplement: s1 [file s1]

## Supplemental Figure S1

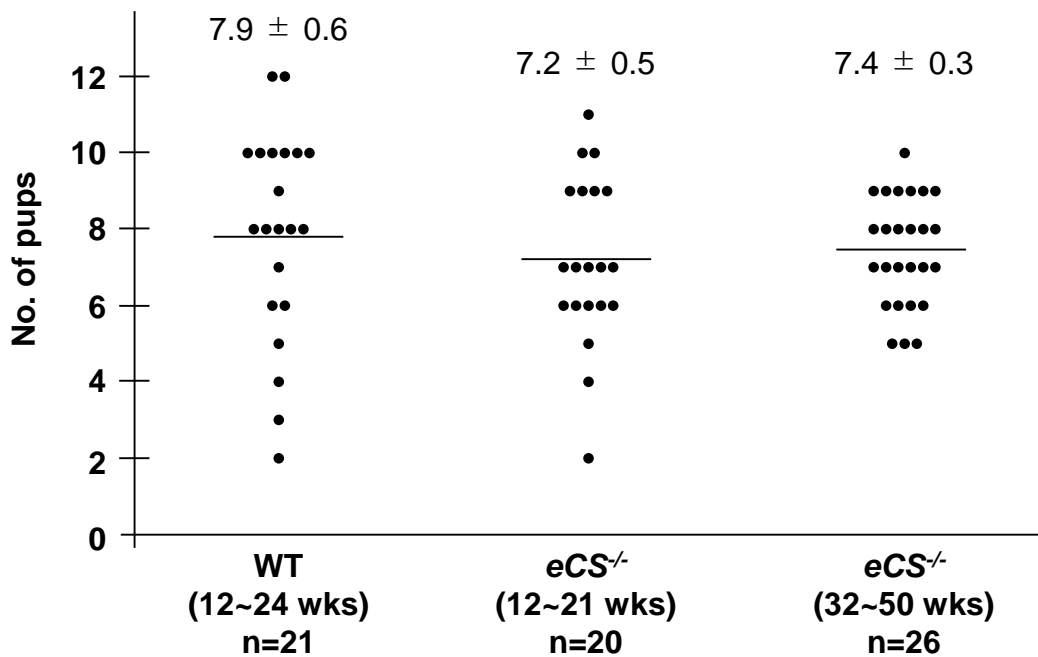

**Figure S1. Fertility of young and aged eCS<sup>-/-</sup> mice.** WT group was mated wild-type female and male mice. eCS<sup>-/-</sup> group was mated wild-type female mice with young or old eCS<sup>-/-</sup> male mice. Copulation was confirmed by checking for vaginal plugs every morning (9:00-11:00) and the number of pups were counted after parturition (20-21 days after plug confirmation). Average number of offspring was showed by means ± S.E.M. There were no significant differences ( $P > 0.05$ ).
